# Supplementary material
Source: HighWire-hosted journal article supplement (https://lupus.bmj.com/content/9/1/e000631)

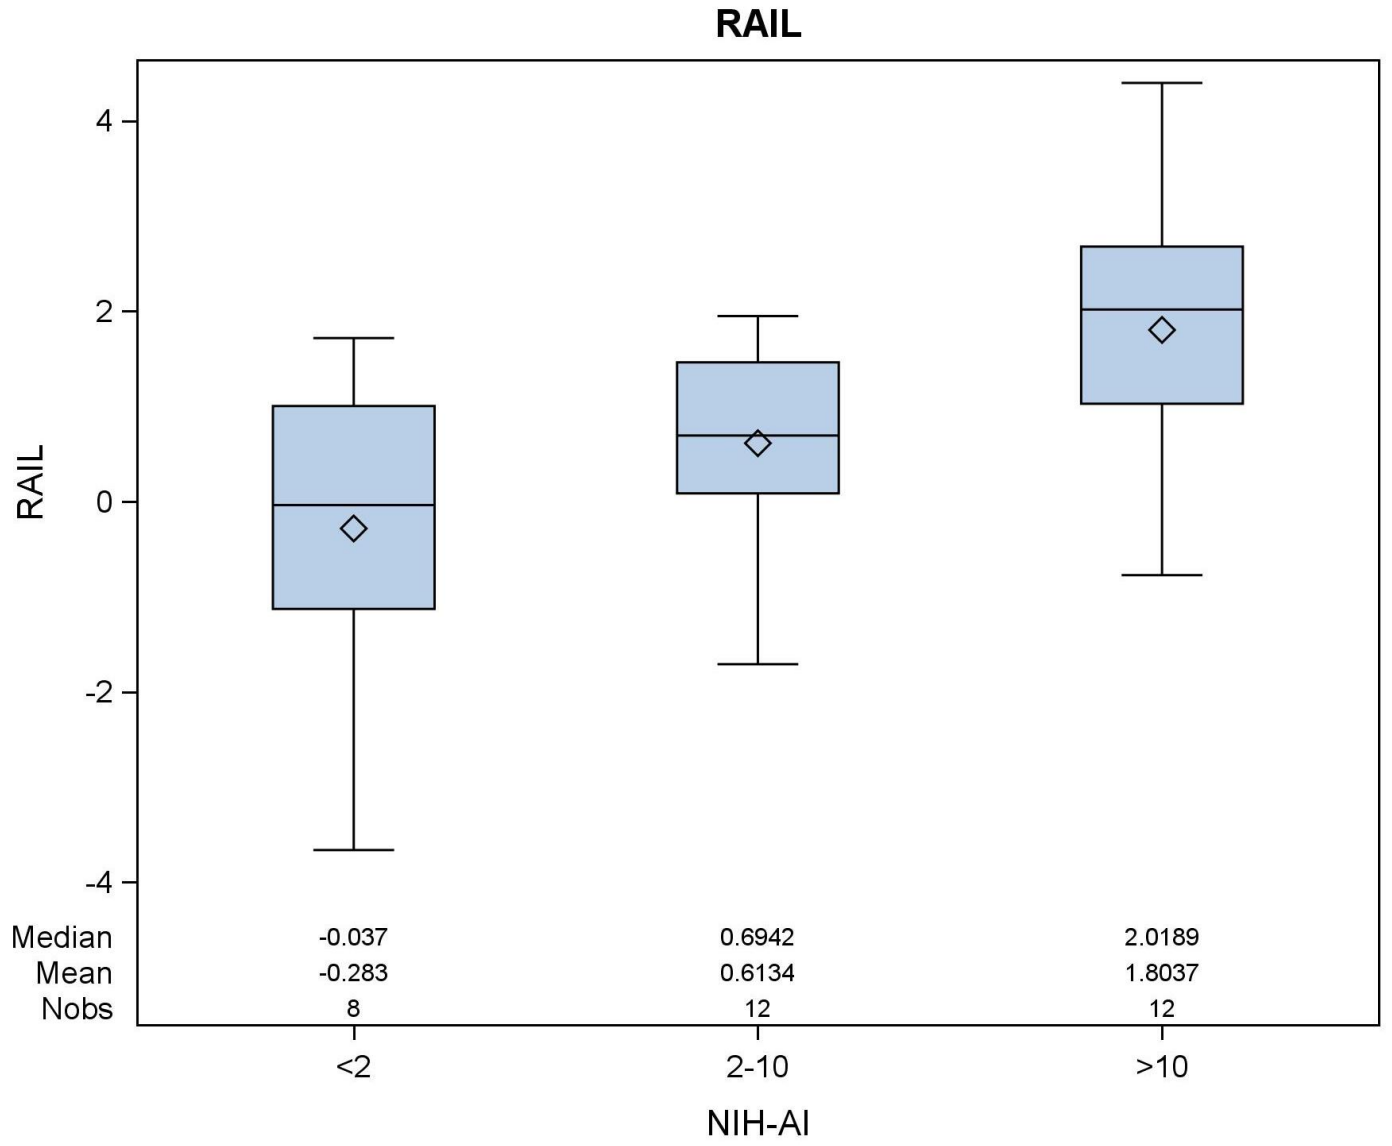

Supplement: inline-supplementary-material-3 [file inline-supplementary-material-3.pdf]

## ROC Curve

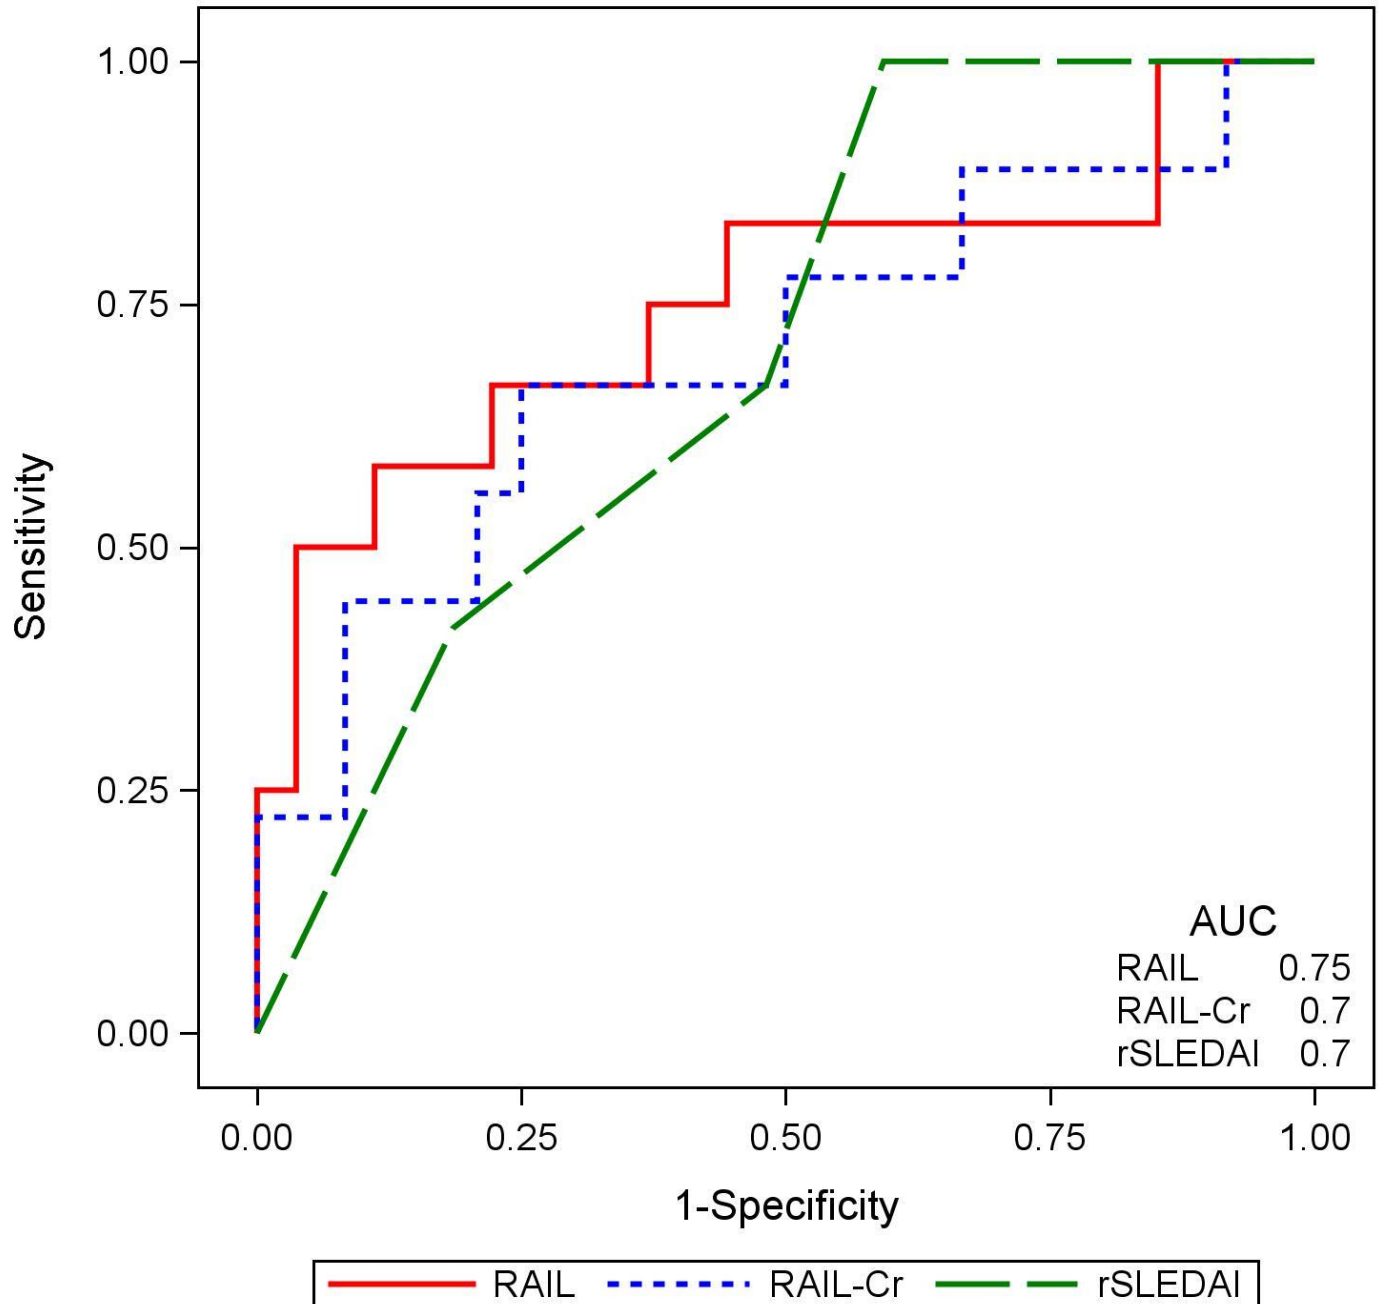

Supplement: inline-supplementary-material-4 [file inline-supplementary-material-4.pdf]
